# Supplementary material for: Determination of respiration and photosynthesis fractionation coefficients for atmospheric dioxygen inferred from a vegetation-soil-atmosphere analog of the terrestrial biosphere in closed chambers
Source: Copernicus journal article supplement (doi:10.5194/bg-2021-324), 2021-12-16
Supplement: Supplementary file 1 [file bg-2021-324-supplement.pdf]

1 *Supplement of*

2

3 **Determination of respiration and photosynthesis fractionation**  
4 **coefficients for atmospheric dioxygen inferred from a vegetation-soil-**  
5 **atmosphere analog of the terrestrial biosphere in closed chambers**

6

7 Clémence Paul<sup>1</sup>, Clément Piel<sup>2</sup>, Joana Sauze<sup>2</sup>, Nicolas Pasquier<sup>1</sup>, Frédéric Prié<sup>1</sup>, Sébastien Devidal<sup>2</sup>,  
8 Roxanne Jacob<sup>1</sup>, Arnaud Dapoigny<sup>1</sup>, Olivier Jossoud<sup>1</sup>, Alexandru Milcu<sup>2,3</sup>, Amaëlle Landais<sup>1</sup>

9

10 <sup>1</sup>Laboratoire des Sciences du Climat et de l'Environnement (LSCE/IPSL/CEA/CNRS/UVSQ/UPS), UMR 8212, Gif-  
11 sur-Yvette, France

12 <sup>2</sup>Ecotron Européen de Montpellier (UAR 3248), Univ Montpellier, Centre National de la Recherche Scientifique  
13 (CNRS), Campus Baillarguet, Montferrier-sur-Lez, France

14 <sup>3</sup>Centre d'Ecologie Fonctionnelle et Evolutive, Univ Montpellier, CNRS, Univ Paul Valéry, EPHE, IRD, Montpellier,  
15 France

16

17 *Correspondence to:* Clémence Paul ([clemence.paul@lsce.ipsl.fr](mailto:clemence.paul@lsce.ipsl.fr))

18

19

20

21

22

23

24

25

26

27

28

29

30

31 **Table S1. Summary of empty chamber test (starting 21 October 2020): evolution of isotopic and**  
 32 **elementary composition of O<sub>2</sub>.**

33

34

35

36

37

38

39

40

41

42 **Table S2. Complete data set of the different fractionation coefficients ( $^{18}\alpha_{soil\_respi}$ ) and**  
 43 **( $^{17}\alpha_{soil\_respi}$ ) and isotopic discriminations ( $^{18}\epsilon_{soil\_respi}$  and  $^{17}\epsilon_{soil\_respi}$ ) of dioxygen and**  
 44 **respiratory fluxes during soil respiration experiment.  $\mu$  is the average over all lines above of the**  
 45 **different quantities and  $\sigma$  the associated standard deviation.**

46

47

| Sequence | $^{18}\alpha_{soil\_respi}$ | $^{18}\epsilon_{soil\_respi}$ (‰) | $^{17}\alpha_{soil\_respi}$ | $^{17}\epsilon_{soil\_respi}$ (‰) | $\gamma_{soil\_respi}$ | O <sub>2</sub> consumed (mmolO <sub>2</sub> /day) |
|----------|-----------------------------|-----------------------------------|-----------------------------|-----------------------------------|------------------------|---------------------------------------------------|
| 1        | 0.9883                      | -11.7                             | 0.9940                      | -6.0                              | 0.5170                 | 2.81                                              |
| 2        | 0.9861                      | -13.9                             | 0.9928                      | -7.2                              | 0.5157                 | 11.78                                             |
| 3        | 0.9898                      | -10.2                             | 0.9947                      | -5.3                              | 0.5163                 | 8.92                                              |
| 4        | 0.9866                      | -13.4                             | 0.9930                      | -6.9                              | 0.5165                 | 6.59                                              |
| $\mu$    | 0.9877                      | -12.3                             | 0.9936                      | -6.4                              | 0.5164                 | 7.52                                              |
| $\sigma$ | 0.0017                      | 1.7                               | 0.0009                      | 0.9                               | 0.0005                 | 3.79                                              |

48

49

50

51

52

53

54

55 **Table S3. Complete data set of the different fractionation coefficients ( $^{18}\alpha_{dark\_respi}$ ) and**  
 56 **( $^{17}\alpha_{dark\_respi}$ ) of dioxygen during dark periods of the photosynthesis and respiration experiment.  $\mu$**   
 57 **is the average over all lines above of the different quantities and  $\sigma$  the associated standard deviation.**  
 58 **The missing data are due to a problem during measurements.**

59

| Sequence | Period | $^{18}\alpha_{dark\_respi}$ | $^{17}\alpha_{dark\_respi}$ | $\gamma_{dark\_respi}$ | O <sub>2</sub> consumed (mmolO <sub>2</sub> /day) |
|----------|--------|-----------------------------|-----------------------------|------------------------|---------------------------------------------------|
| 1        | 1      | 0.9846                      | 0.9921                      | 0.5105                 | 21.77                                             |
|          | 2      | 0.9844                      | 0.9921                      | 0.5045                 | 21.46                                             |
|          | 3      | 0.9848                      | 0.9922                      | 0.5084                 | 18.57                                             |
|          | 4      | 0.9841                      | 0.9917                      | 0.5224                 | 14.98                                             |
| 2        | 1      | 0.9822                      | 0.9909                      | 0.5077                 | 36.61                                             |
|          | 2      | 0.9794                      |                             |                        | 25.93                                             |
|          | 3      | 0.9825                      | 0.9909                      | 0.5183                 | 31.03                                             |
| 3        | 1      | 0.9821                      | 0.9911                      | 0.4977                 | 26.17                                             |
|          | 2      | 0.9803                      | 0.9897                      | 0.5238                 | 26.15                                             |
|          | 3      | 0.9853                      | 0.9924                      | 0.5141                 | 31.65                                             |
| $\mu$    |        | 0.9830                      | 0.9914                      | 0.5124                 | 25.43                                             |
| $\sigma$ |        | 0.0020                      | 0.0008                      | 0.0084                 | 6.51                                              |

60

### 61 Sensibility tests

62

63 We quantify how much the uncertainties in the fractions of the biological process (dark respiration,  
 64 photorespiration and the Mehler reaction) could affect the values of dark respiratory and  
 65 photosynthetic fractionation coefficients determined in our study (Tables S5, S6 and S7). For this, we  
 66 start from the values given by Landais et al. (2007):  $f_{dark\_respi}$  (0.6),  $f_{photorespi}$  (0.3) and  $f_{Mehler}$  (0.1)  
 67 and varied the fractions as indicated in Table S5 (tests 0, 1 and 2).

68 In addition, we did other tests for uncertainties in the values of the fractionation coefficient of  
 69 photorespiration given by Helman et al. (2005) (test 3 in grey columns of Tables S5, S6 and S7). The  
 70 initial values for photorespiration isotopic discrimination are respectively -21.3 ‰ and -11.07 ‰ for  
 71  $^{18}\epsilon_{photo\_respi}$  and  $^{17}\epsilon_{photo\_respi}$  as given by Helman et al. (2005). From uncertainties on these values  
 72 of 0.5 ‰ and 0.3 ‰ for  $^{18}\epsilon_{photo\_respi}$  and  $^{17}\epsilon_{photo\_respi}$  (Helman et al., 2005), we used alternative  
 73 values of -20.8 ‰ and -11.04 ‰ for  $^{18}\epsilon_{photo\_respi}$  and  $^{17}\epsilon_{photo\_respi}$ . For the Mehler reaction we also  
 74 chose the value proposed by Helman et al. (2005):  $^{18}\epsilon_{Mehler} = -10.8$  ‰ and  $^{17}\epsilon_{Mehler} = -5.7$  ‰. We  
 75 did not test the uncertainty on fractionation coefficients of the Mehler reaction as given by Helman et  
 76 al. (2005), because the uncertainties are very small.

77

78

79 **Table S4. Details of input parameters for sensitivity tests. White columns detail the tests on the**  
80 **fractions of oxygen consumption and isotopic discriminations; grey column details the test on the**  
81 **values of isotopic discrimination.**

82

83

84

85

86

87

88

|                                | Test 0 | Test 1 | Test 2 | Test 3 |
|--------------------------------|--------|--------|--------|--------|
| $f_{dark\_respi}$              | 1      | 0.9    | 0.4    | 0.6    |
| $f_{photo\_respi}$             | 0      | 0      | 0.5    | 0.3    |
| $f_{Mehler}$                   | 0      | 0.1    | 0.1    | 0.1    |
| $^{18}\epsilon_{photo\_respi}$ | -21.3  | -21.3  | -21.3  | -20.8  |
| $^{17}\epsilon_{photo\_respi}$ | -11.07 | -11.07 | -11.07 | -11.04 |

89

90

91 **Table S5.  $\alpha_{total\_respi}$  values obtained from the sensitivity tests: results of sensitivity tests on**  
92 **dioxygen consumption fractions (white columns) and on uncertainties in fractionation coefficient**  
93 **values (grey column).  $\mu$  is the average over all lines above of the different quantities and  $\sigma$  the**  
94 **associated standard deviation. The missing data are due to a problem during measurements.**

| Sequence | Period | $^{18}\alpha_{total\_respi0}$<br>Test 0 | $^{18}\alpha_{total\_respi1}$<br>Test 1 | $^{18}\alpha_{total\_respi2}$<br>Test 2 | $^{18}\alpha_{total\_respi3}$<br>Test 3 | $^{17}\alpha_{total\_respi0}$<br>Test 0 | $^{17}\alpha_{total\_respi1}$<br>Test 1 | $^{17}\alpha_{total\_respi2}$<br>Test 2 | $^{17}\alpha_{total\_respi3}$<br>Test 3 |
|----------|--------|-----------------------------------------|-----------------------------------------|-----------------------------------------|-----------------------------------------|-----------------------------------------|-----------------------------------------|-----------------------------------------|-----------------------------------------|
| 1        | 1      | 0.9868                                  | 0.9870                                  | 0.9830                                  | 0.9847                                  | 0.9933                                  | 0.9934                                  | 0.9912                                  | 0.9921                                  |
|          | 2      | 0.9865                                  | 0.9868                                  | 0.9829                                  | 0.9846                                  | 0.9933                                  | 0.9934                                  | 0.9912                                  | 0.9921                                  |
|          | 3      | 0.9871                                  | 0.9873                                  | 0.9831                                  | 0.9849                                  | 0.9935                                  | 0.9936                                  | 0.9913                                  | 0.9922                                  |
|          | 4      | 0.9859                                  | 0.9862                                  | 0.9826                                  | 0.9842                                  | 0.9926                                  | 0.9927                                  | 0.9909                                  | 0.9917                                  |
| 2        | 1      | 0.9828                                  | 0.9835                                  | 0.9814                                  | 0.9824                                  | 0.9913                                  | 0.9916                                  | 0.9904                                  | 0.9909                                  |
|          | 2      | 0.9781                                  | 0.9792                                  | 0.9795                                  | 0.9795                                  | 0.9913                                  | 0.9916                                  | 0.9904                                  | 0.9909                                  |
|          | 3      | 0.9834                                  | 0.9839                                  | 0.9816                                  | 0.9827                                  |                                         |                                         |                                         |                                         |
| 3        | 1      | 0.9827                                  | 0.9833                                  | 0.9813                                  | 0.9822                                  | 0.9916                                  | 0.9919                                  | 0.9908                                  | 0.9911                                  |
|          | 2      | 0.9797                                  | 0.9806                                  | 0.9801                                  | 0.9805                                  | 0.9892                                  | 0.9897                                  | 0.9898                                  | 0.9897                                  |
|          | 3      | 0.9879                                  | 0.9880                                  | 0.9834                                  | 0.9854                                  | 0.9938                                  | 0.9939                                  | 0.9917                                  | 0.9924                                  |
| $\mu$    |        | 0.9838                                  | 0.9843                                  | 0.9818                                  | 0.9829                                  | 0.9922                                  | 0.9924                                  | 0.9909                                  | 0.9914                                  |
| $\sigma$ |        | 0.0031                                  | 0.0028                                  | 0.0013                                  | 0.0019                                  | 0.0014                                  | 0.0013                                  | 0.00055                                 | 0.0008                                  |

95

96

97

98 **Table S6.  $\alpha_{\text{photosynthesis}}$  values obtained from the sensitivity tests: results of sensitivity tests on**  
 99 **dioxygen consumption fractions (white columns) and on uncertainties in fractionation coefficient**  
 100 **values (grey column).  $\mu$  is the average over all lines above of the different quantities and  $\sigma$  the**  
 101 **associated standard deviation.**

102

| Sequence | Period | $^{18}\alpha_{\text{photosynthesis}0}$<br>Test 0 | $^{18}\alpha_{\text{photosynthesis}0}$<br>Test 1 | $^{18}\alpha_{\text{photosynthesis}0}$<br>Test 2 | $^{18}\alpha_{\text{photosynthesis}0}$<br>Test 3 | $^{17}\alpha_{\text{photosynthesis}0}$<br>Test 0 | $^{17}\alpha_{\text{photosynthesis}0}$<br>Test 1 | $^{17}\alpha_{\text{photosynthesis}0}$<br>Test 2 | $^{17}\alpha_{\text{photosynthesis}0}$<br>Test 3 |
|----------|--------|--------------------------------------------------|--------------------------------------------------|--------------------------------------------------|--------------------------------------------------|--------------------------------------------------|--------------------------------------------------|--------------------------------------------------|--------------------------------------------------|
| 1        | 1      | 0.9941                                           | 0.9944                                           | 0.9951                                           | 0.9969                                           | 0.9969                                           | 0.9970                                           | 0.9974                                           | 0.9972                                           |
|          | 2      | 1.0040                                           | 1.0040                                           | 1.0036                                           | 1.0038                                           | 1.0020                                           | 1.0020                                           | 1.0018                                           | 1.0019                                           |
|          | 3      | 1.0039                                           | 1.0039                                           | 1.0034                                           | 1.0037                                           | 1.0017                                           | 1.0017                                           | 1.0015                                           | 1.0016                                           |
| 2        | 1      | 1.0021                                           | 1.0023                                           | 1.0023                                           | 1.0024                                           | 1.0013                                           | 1.0014                                           | 1.0013                                           | 1.0013                                           |
|          | 2      | 1.0043                                           | 1.0044                                           | 1.0040                                           | 1.0043                                           | 1.0021                                           | 1.0021                                           | 1.0019                                           | 1.0020                                           |
| 3        | 1      | 1.0037                                           | 1.0039                                           | 1.0039                                           | 1.0040                                           | 1.0096                                           | 1.0021                                           | 1.0021                                           | 1.0021                                           |
|          | 2      | 1.0019                                           | 1.0022                                           | 1.0026                                           | 1.0024                                           | 1.0013                                           | 1.0014                                           | 1.0016                                           | 1.0014                                           |
|          | 3      | 1.0063                                           | 1.0066                                           | 1.0056                                           | 1.0062                                           | 1.0034                                           | 1.0035                                           | 1.0030                                           | 1.0035                                           |
| $\mu$    |        | 1.0026                                           | 1.0027                                           | 1.0026                                           | 1.0030                                           | 1.0023                                           | 1.0014                                           | 1.0013                                           | 1.0013                                           |
| $\sigma$ |        | 0.0039                                           | 0.0034                                           | 0.0030                                           | 0.0025                                           | 0.0033                                           | 0.0018                                           | 0.0016                                           | 0.0017                                           |

103

104

105 **Table S7. Complete data set of the different average photosynthesis coefficient fractionations of**  
 106 **oxygen during light periods during the photosynthesis and respiration experiment.**  
 107  $\mu$  is the average over all lines above of the different quantities and  $\sigma$  the associated standard deviation.

108

109

| Sequence | Period | $^{18}\alpha_{\text{photosynthesis}}$ | $^{17}\alpha_{\text{photosynthesis}}$ | $\gamma_{\text{photosynthesis}}$ |
|----------|--------|---------------------------------------|---------------------------------------|----------------------------------|
| 1        | 1      | 0.9947                                | 0.9972                                | 0.5296                           |
|          | 2      | 1.0038                                | 1.0019                                | 0.5067                           |
|          | 3      | 1.0037                                | 1.0016                                | 0.4420                           |
| 2        | 1      | 1.0023                                | 1.0013                                | 0.5672                           |
|          | 2      | 1.0043                                | 1.0020                                | 0.4794                           |
| 3        | 1      | 1.0039                                | 1.0020                                | 0.5202                           |
|          | 2      | 1.0024                                | 1.0014                                | 0.6047                           |
|          | 3      | 1.0061                                | 1.0032                                | 0.5248                           |
| $\mu$    |        | 1.0027                                | 1.0013                                | 0.5218                           |
| $\sigma$ |        | 0.0032                                | 0.0017                                | 0.0498                           |

110

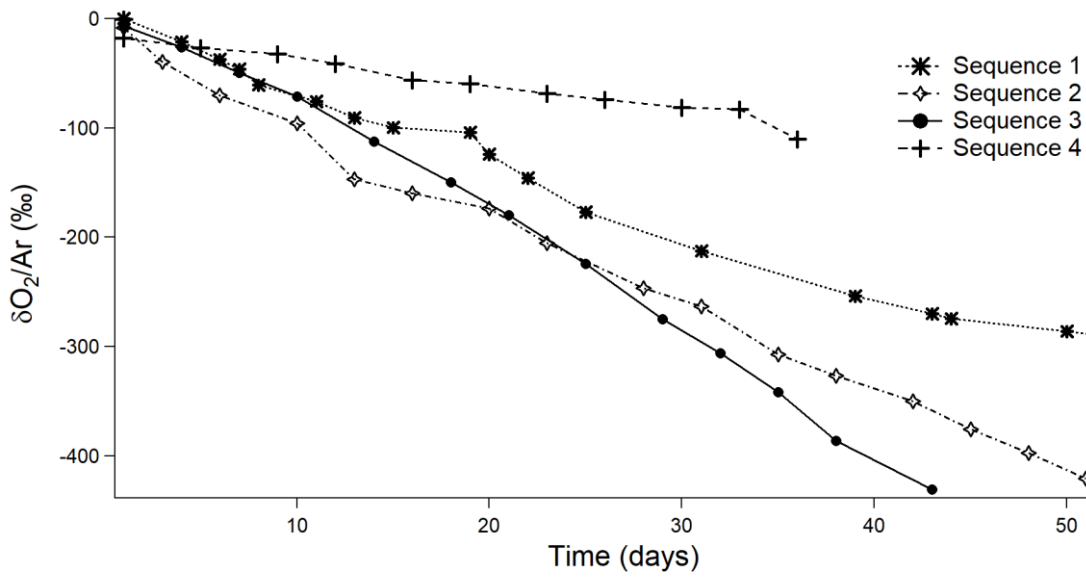

111

112 **Fig.S1. Comparison of the evolution of the O<sub>2</sub> concentration of the sequence 1, 2, 3 and 4 during**  
 113 **the soil respiration experiment.**

114

115 **1)**

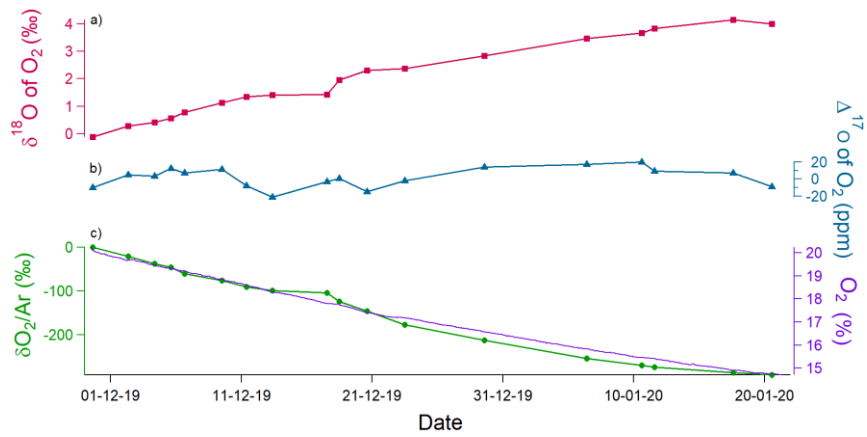

116

117 **2)**

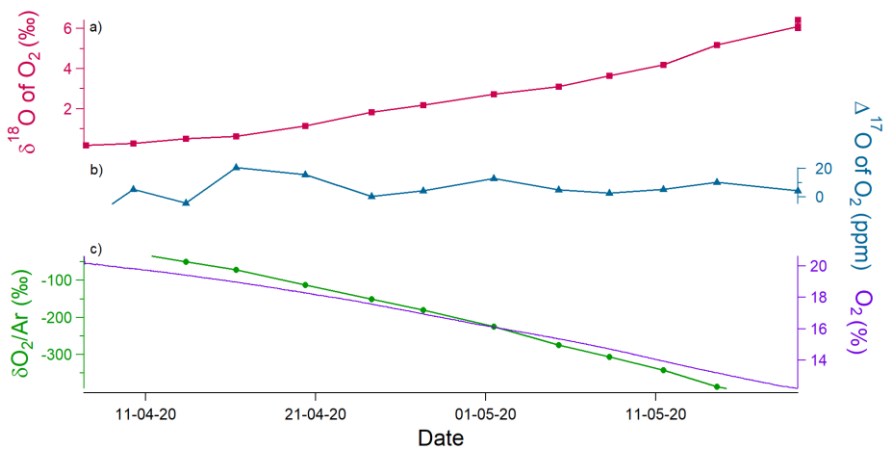

118

119

120 3)

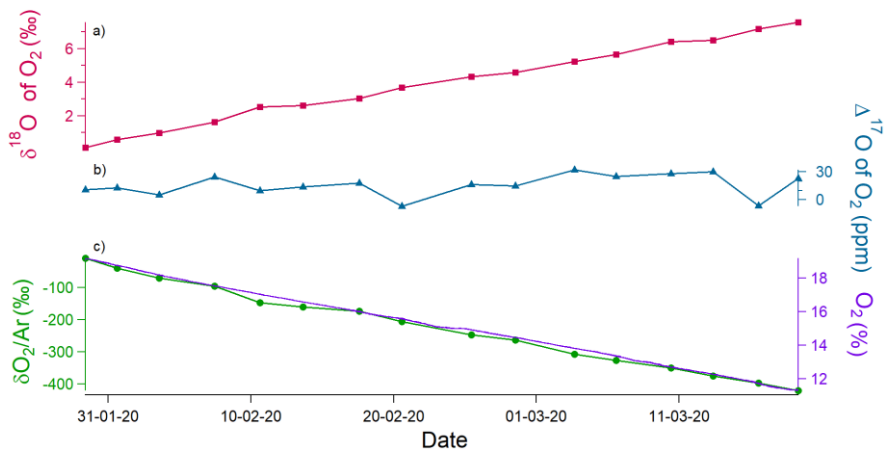

121

122

123

124 **Fig.S2. Summary of the first (1), third (2) and fourth (3) sequences of the soil respiration experiment.**  
125 **(a)  $\delta^{18}\text{O}$  of  $\text{O}_2$  (red) variations. (b)  $\Delta^{17}\text{O}$  of  $\text{O}_2$  (blue) variations. (c) Dioxygen (purple) and  $\delta\text{O}_2/\text{Ar}$**   
126 **variations (green).**

127

128

129 1)

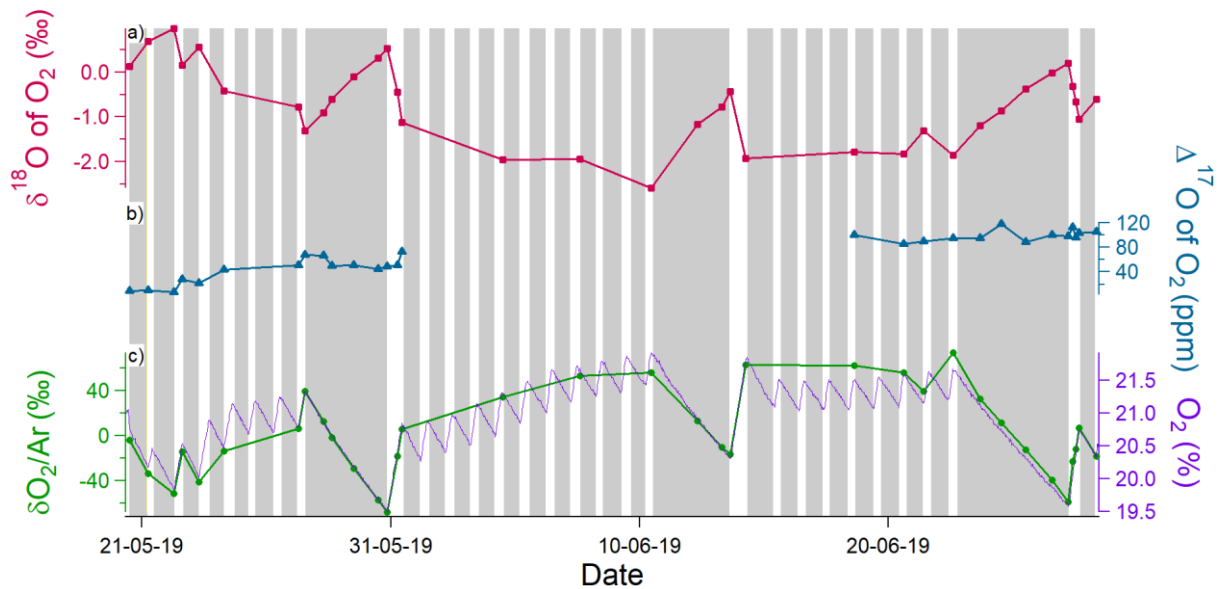

130

131

132

133

134

135

136 2)

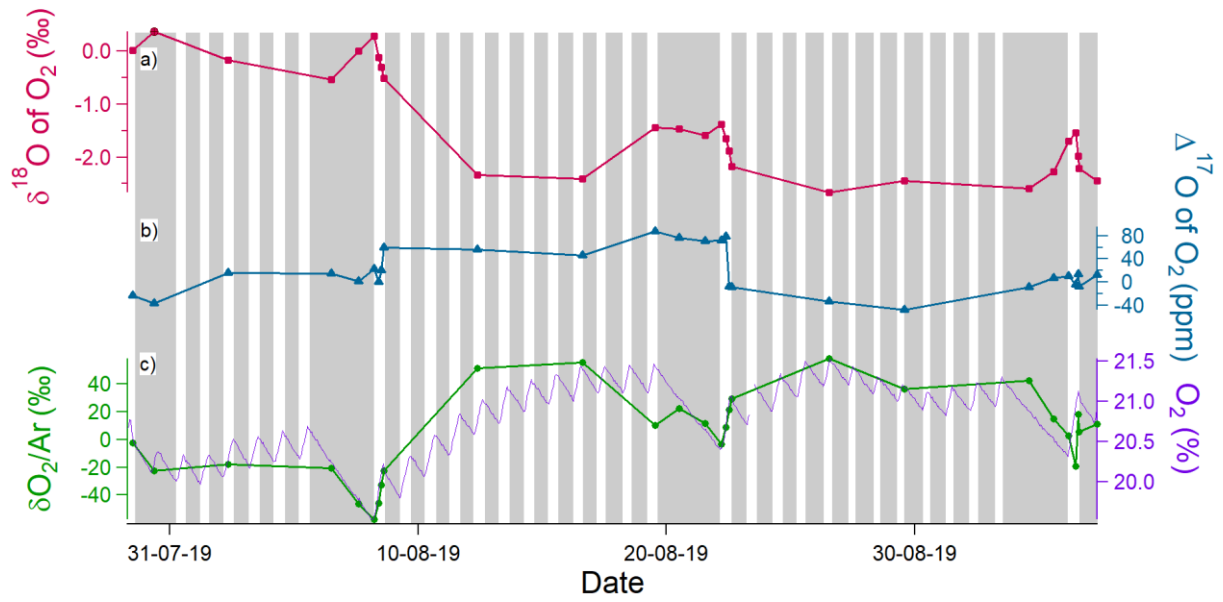

137

138 **Fig.S3. Summary of the second (1) and third (2) sequences of the soil respiration experiment. Grey**  
139 **rectangles correspond to night periods and white rectangles to light periods. (a)  $\delta^{18}\text{O}$  of  $\text{O}_2$  (red)**  
140 **variations. (b)  $\Delta^{17}\text{O}$  of  $\text{O}_2$  (blue) variations. (c) Dioxygen concentration (purple) and  $\delta\text{O}_2/\text{Ar}$  variations**  
141 **(green).**
